# Supplementary material for: Cancer-associated fibroblast-derived extracellular vesicles promote lymph node metastases in oral cavity squamous cell carcinoma by encapsulating ITGB1 and BMI1
Source: Springer Nature journal article supplement (doi:10.1186/s12885-024-11855-0), 2024-01-22

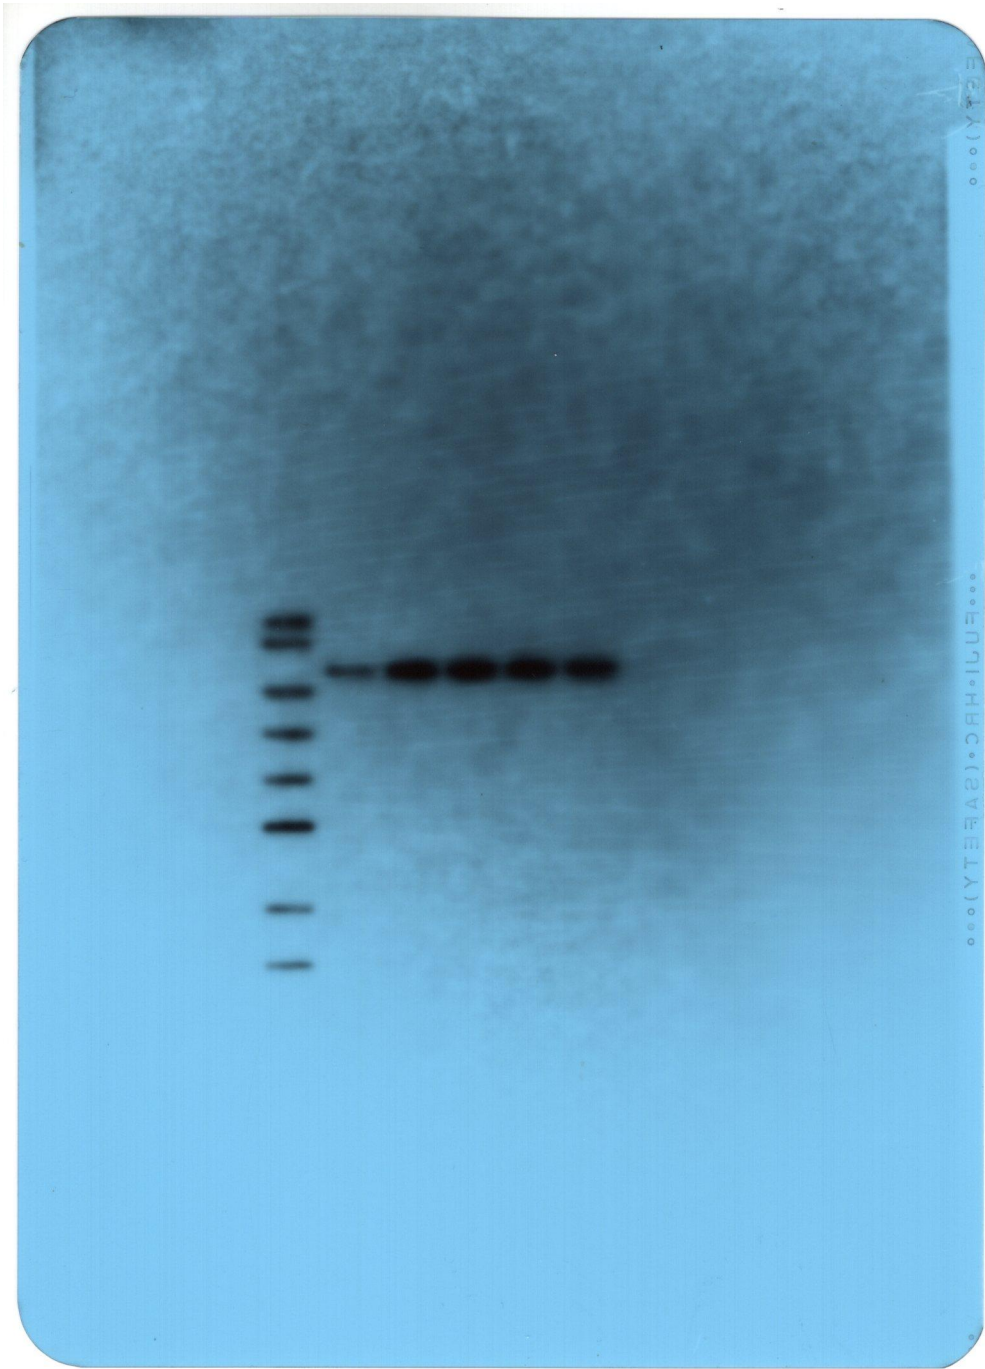

...EATY)000

...ENI(HBC(SVRELLY)000

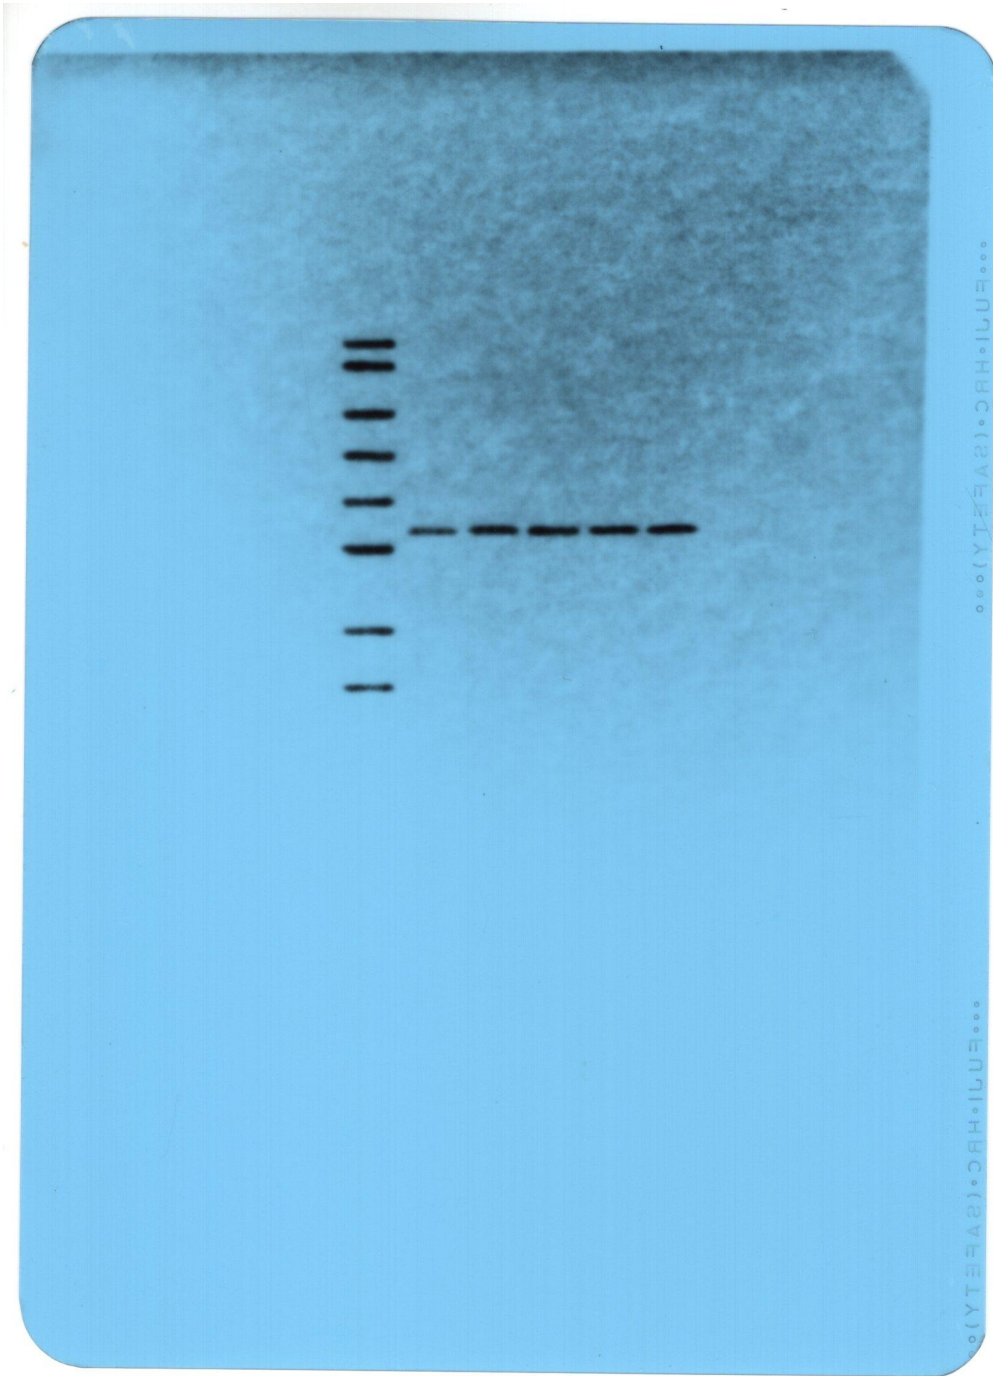



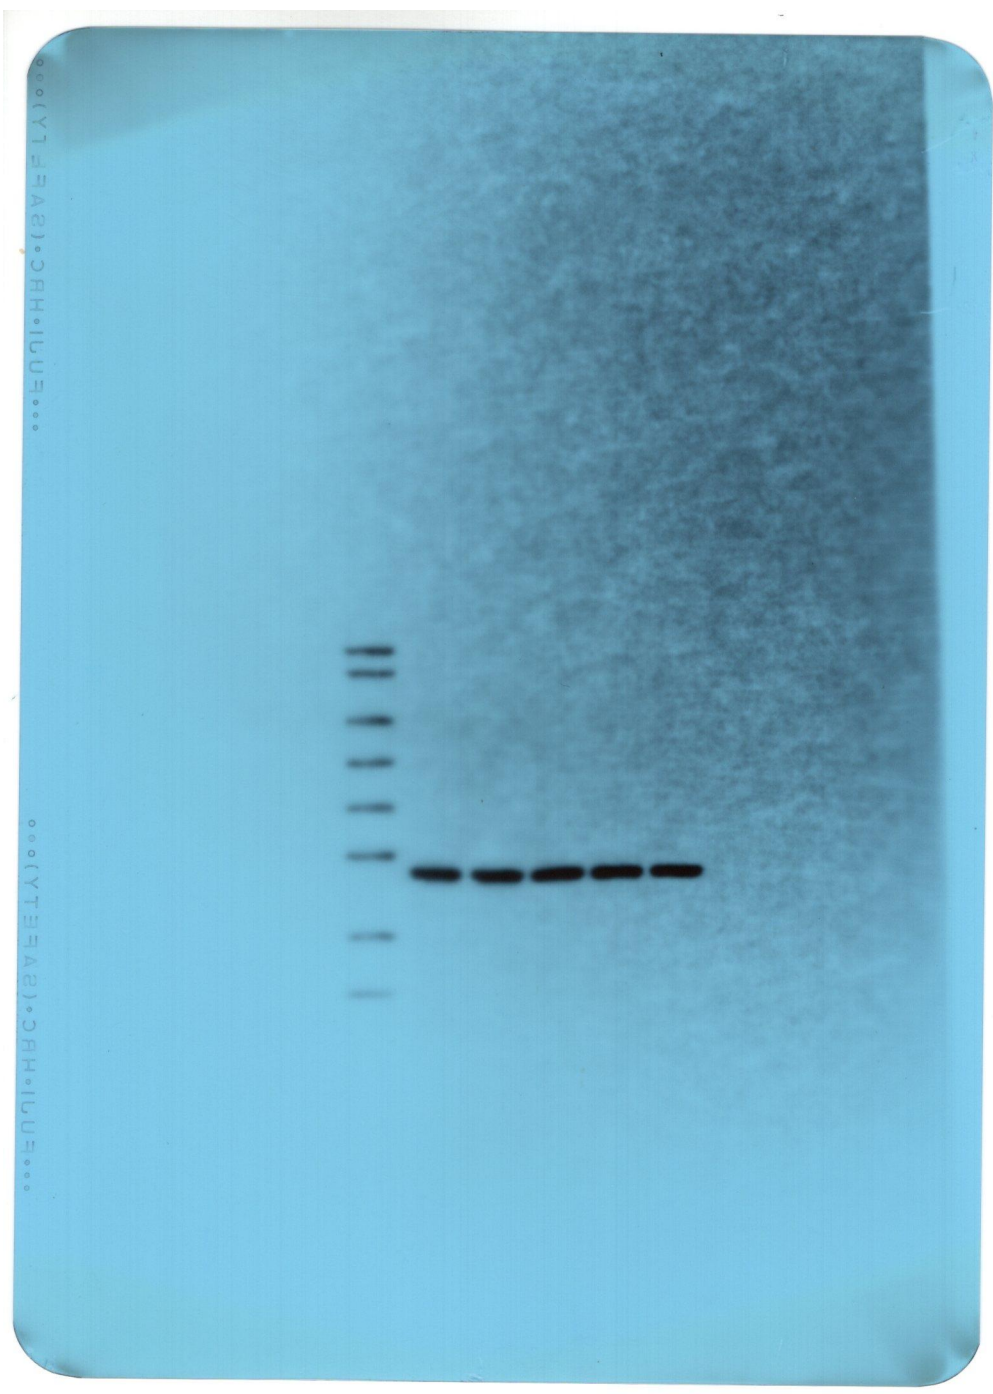

...EΠI·HBC·(2)F(X)...

...EΠI·HBC·(2)F(X)...

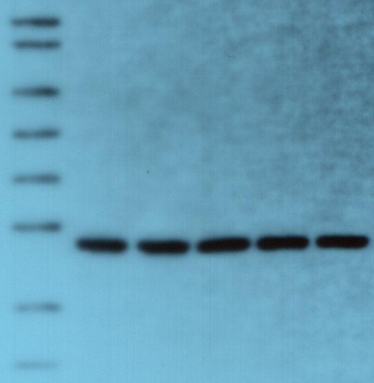

**Fig 1D: CD81, TSG101, Flotillin 1, ALIX, Calnexin**

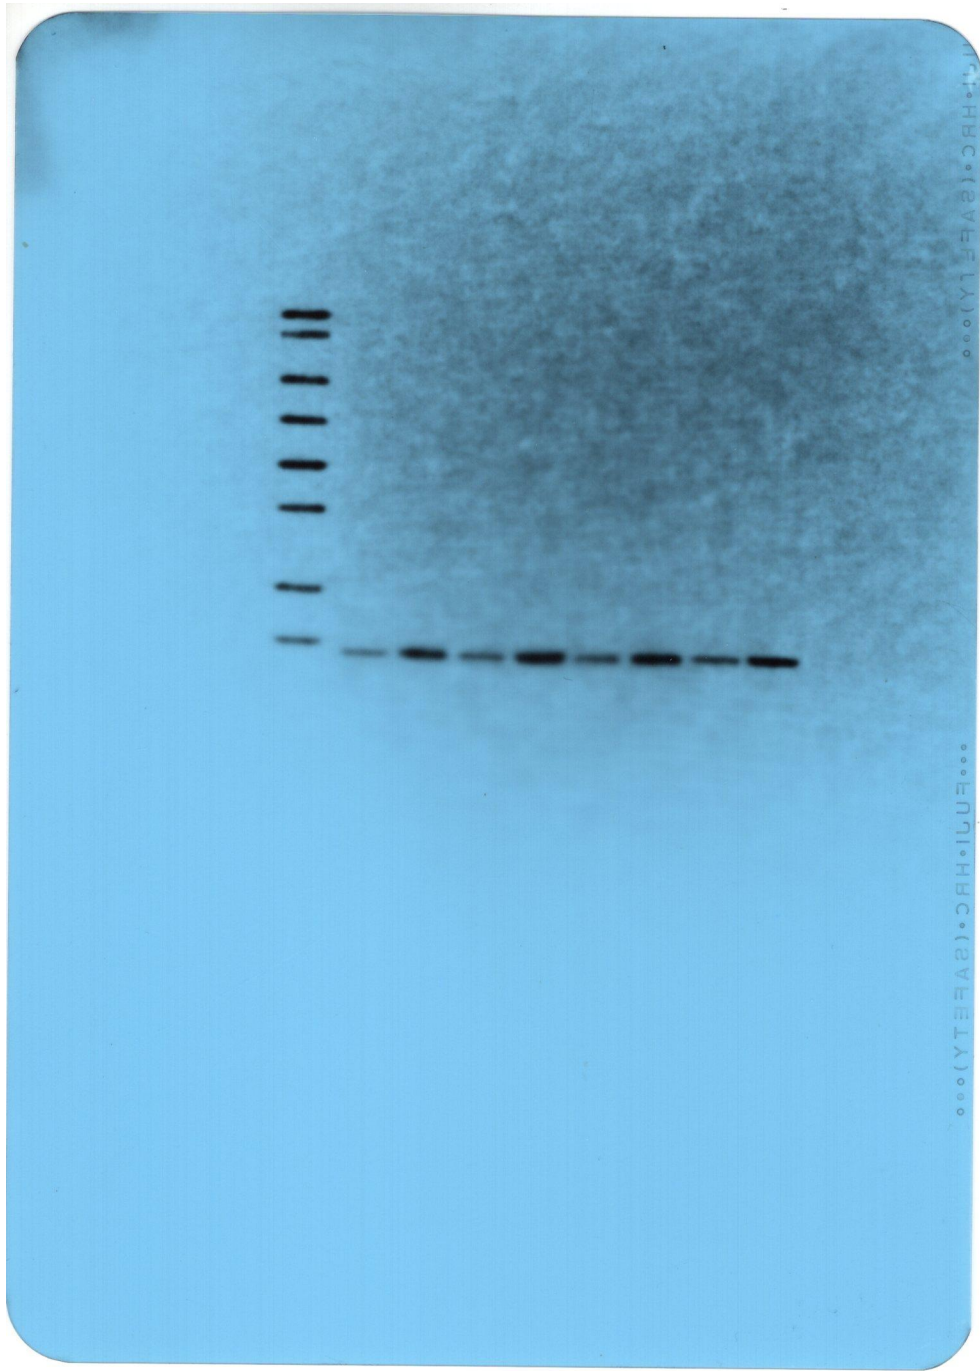

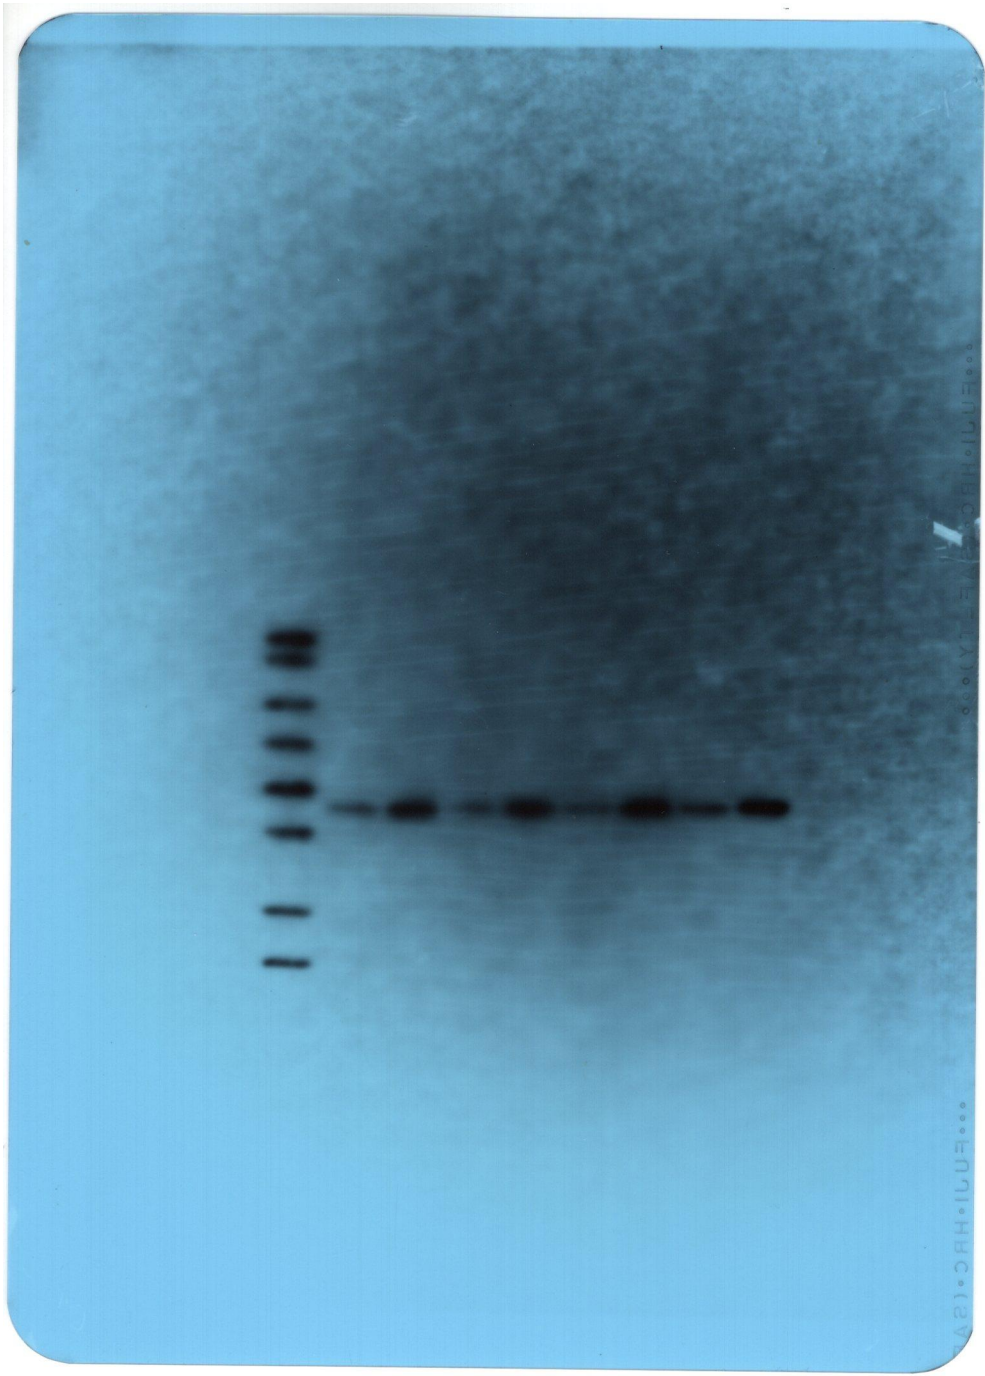

...ENQI•HHC•(87

...ENQI•HHC•(87



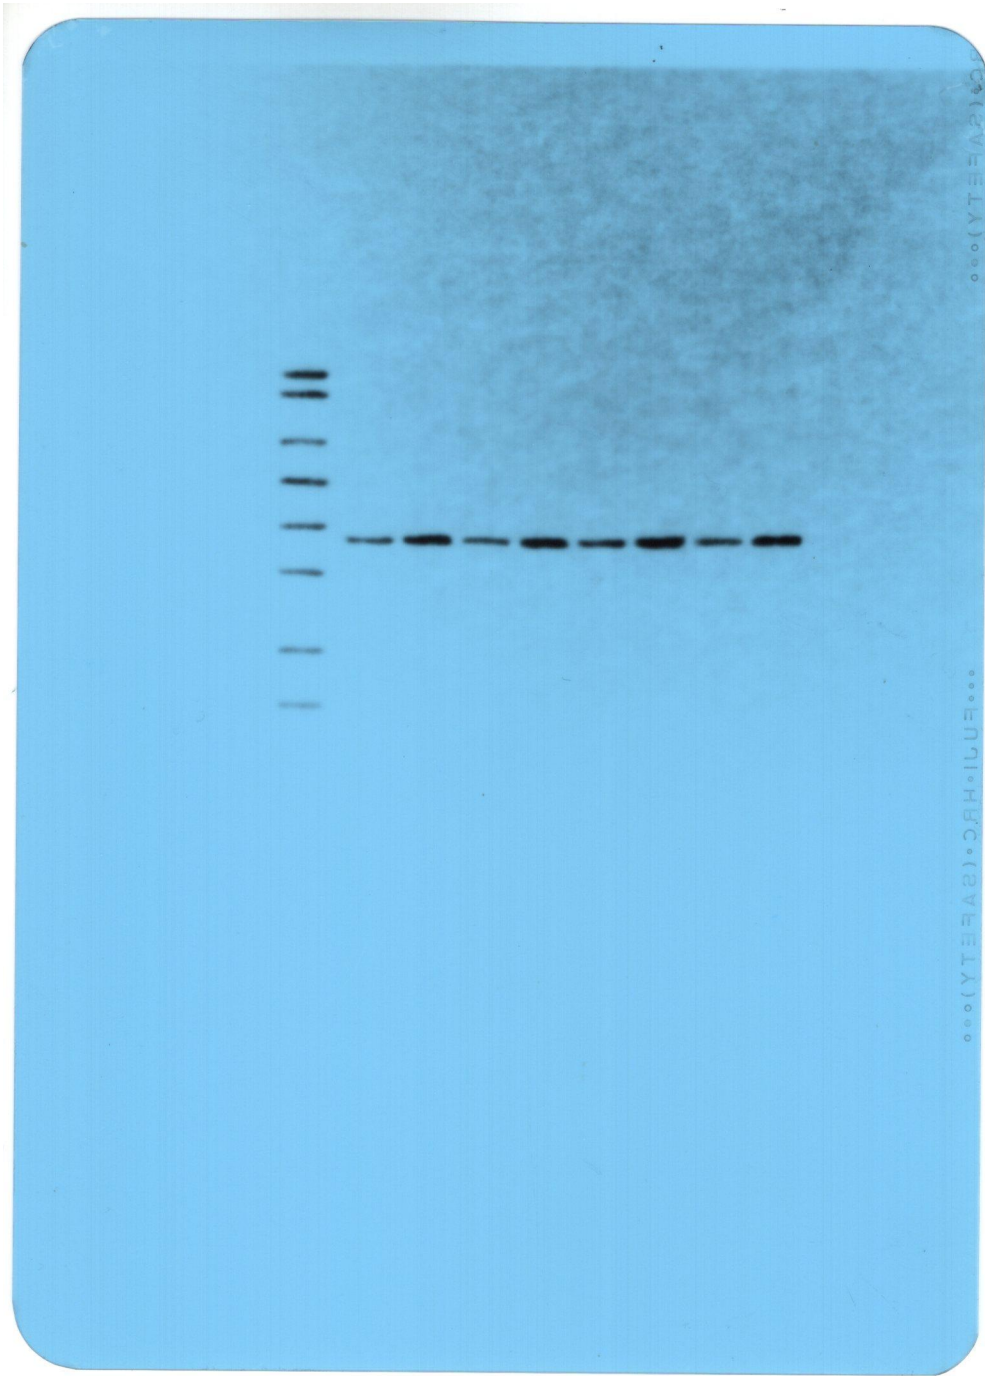

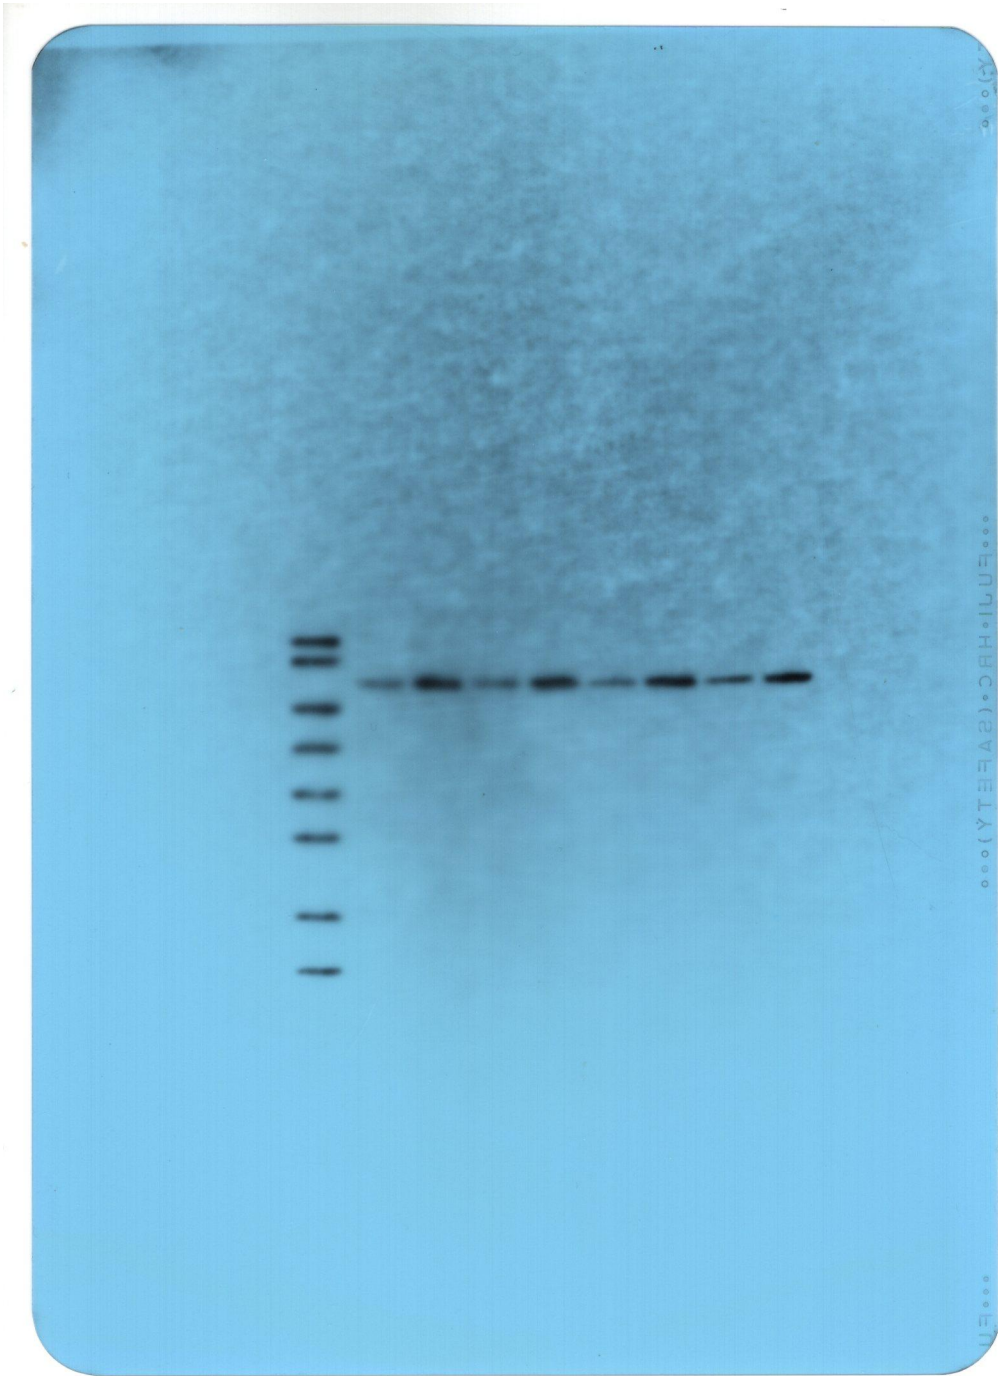



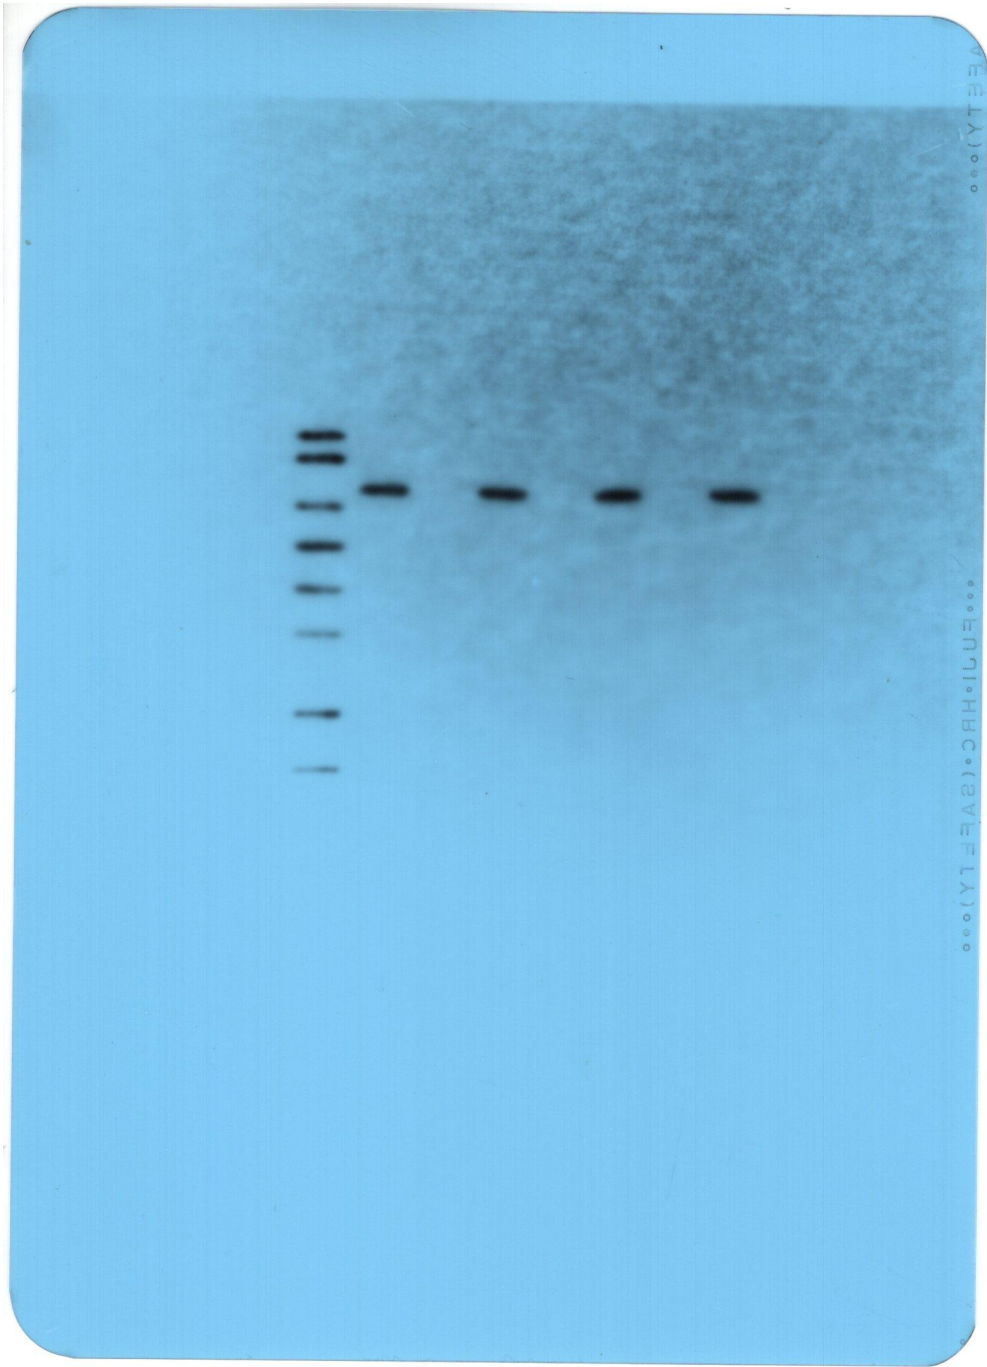

**Fig 3I: BMI1, ITGB1, GAPDH**

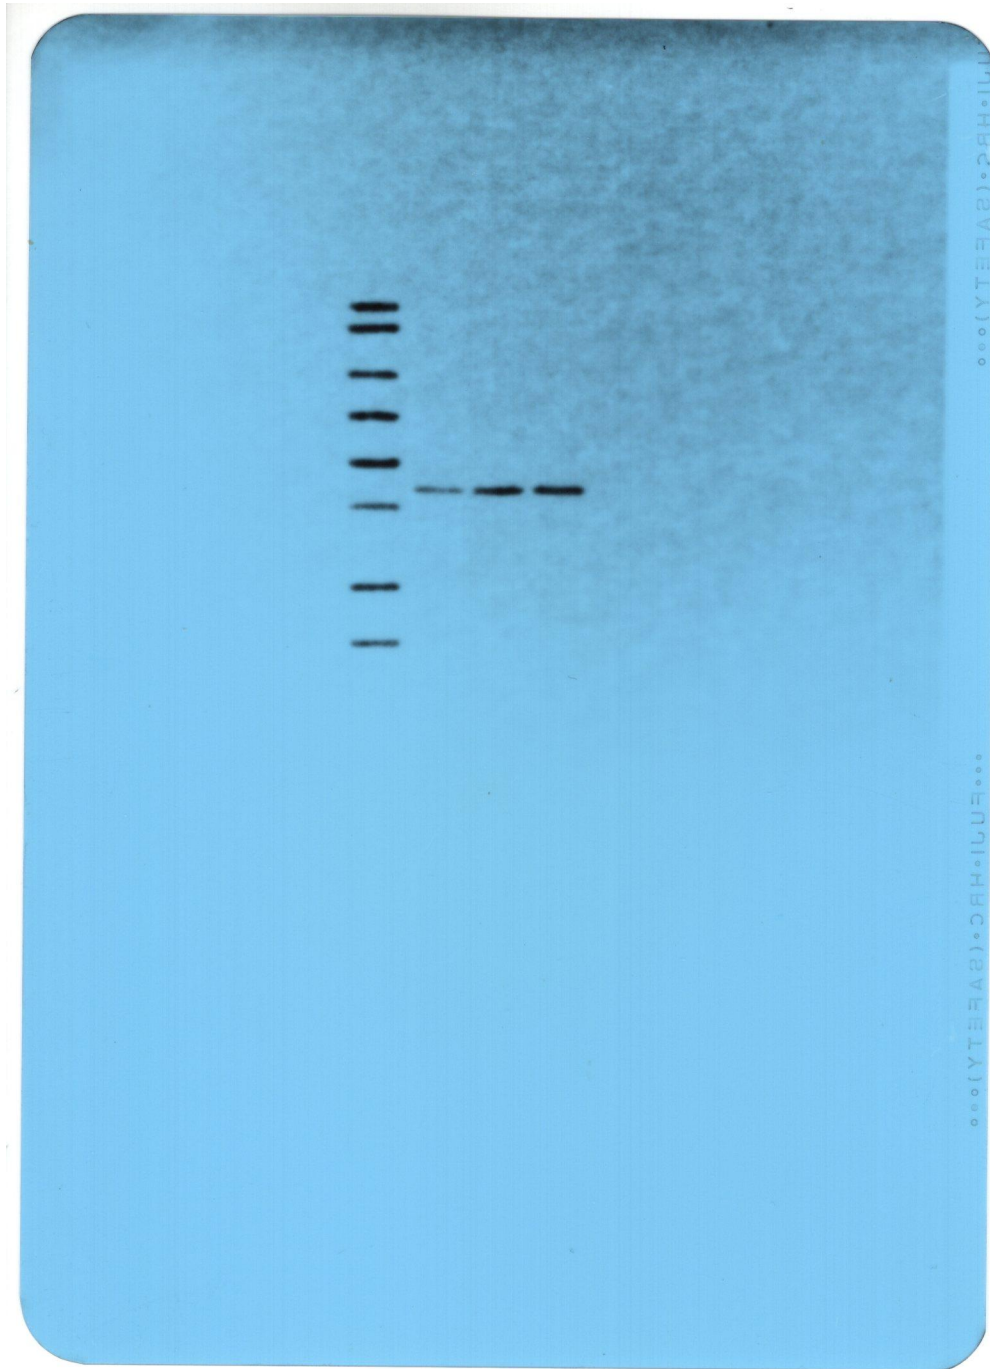

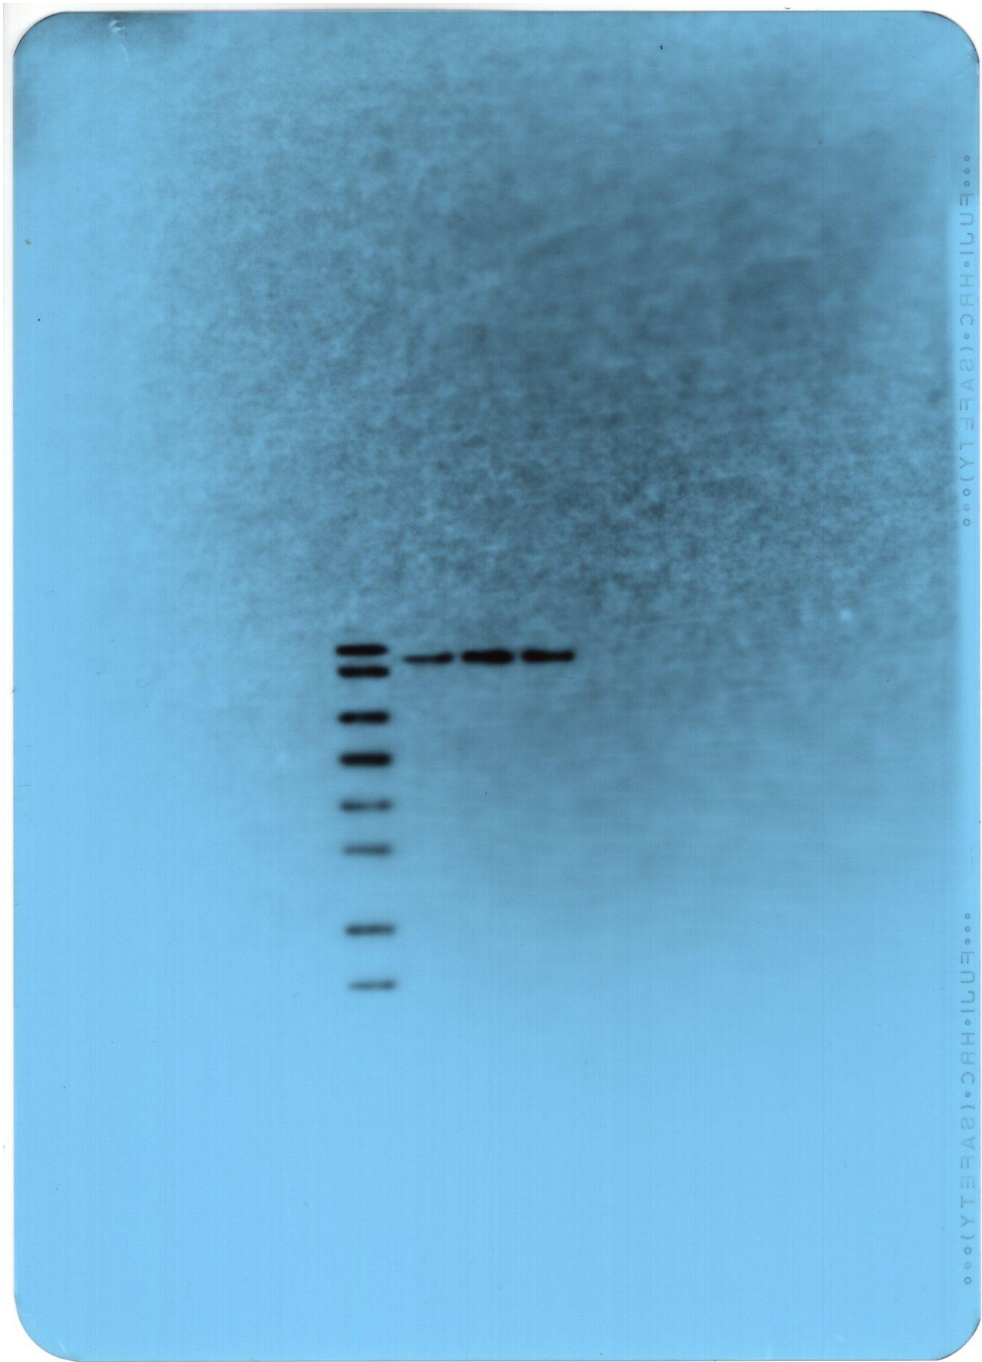



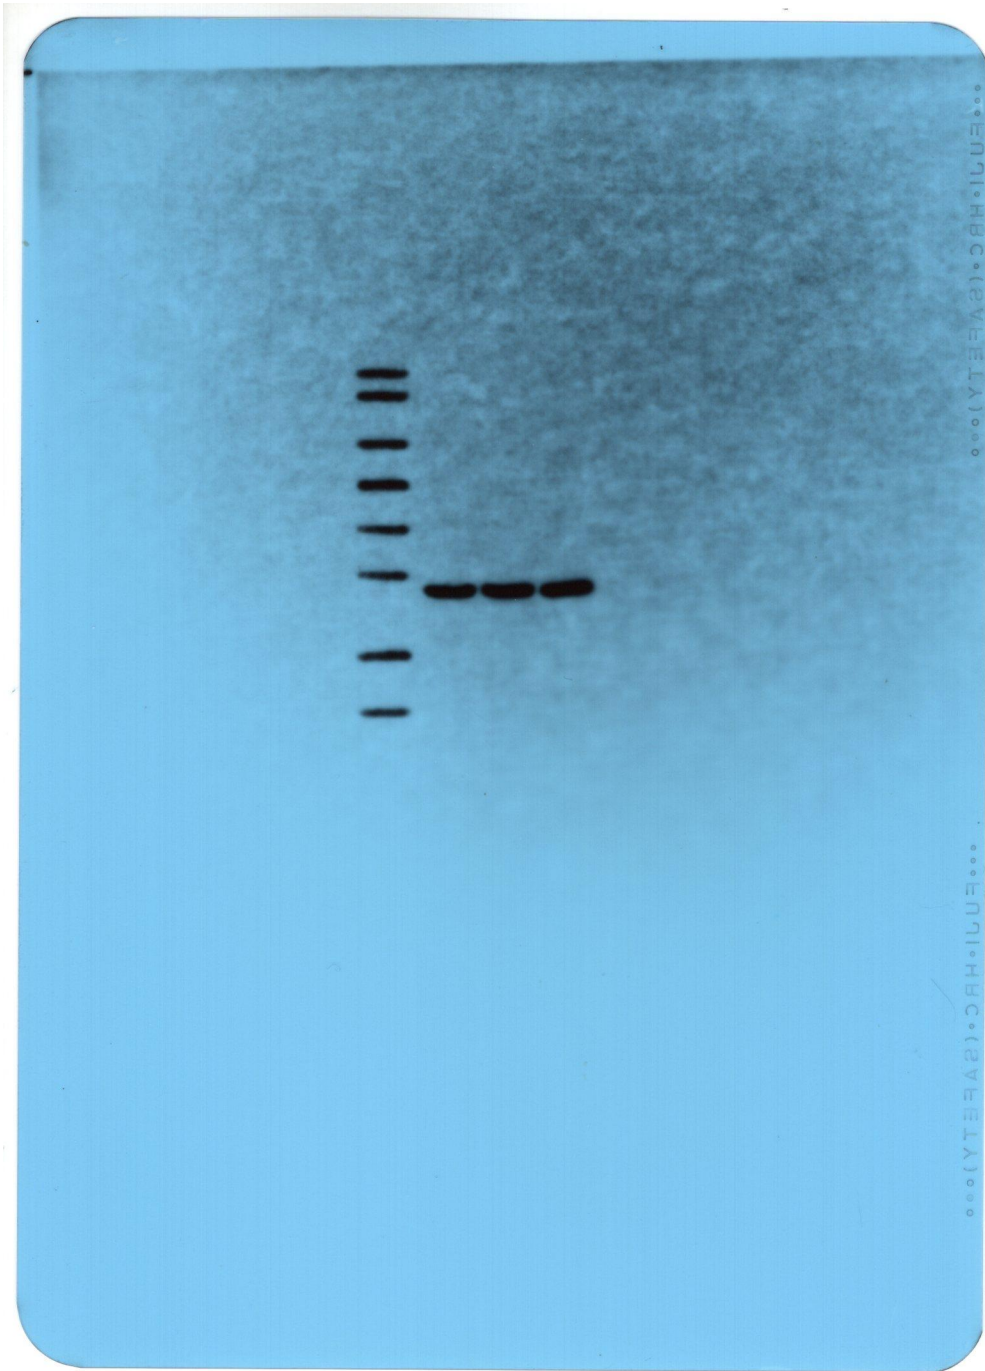

...ENJI•HRC•(SPEETY)...

...ENJI•HRC•(SPEETY)...

**Fig 3J: BMI1, ITGB1, GAPDH**

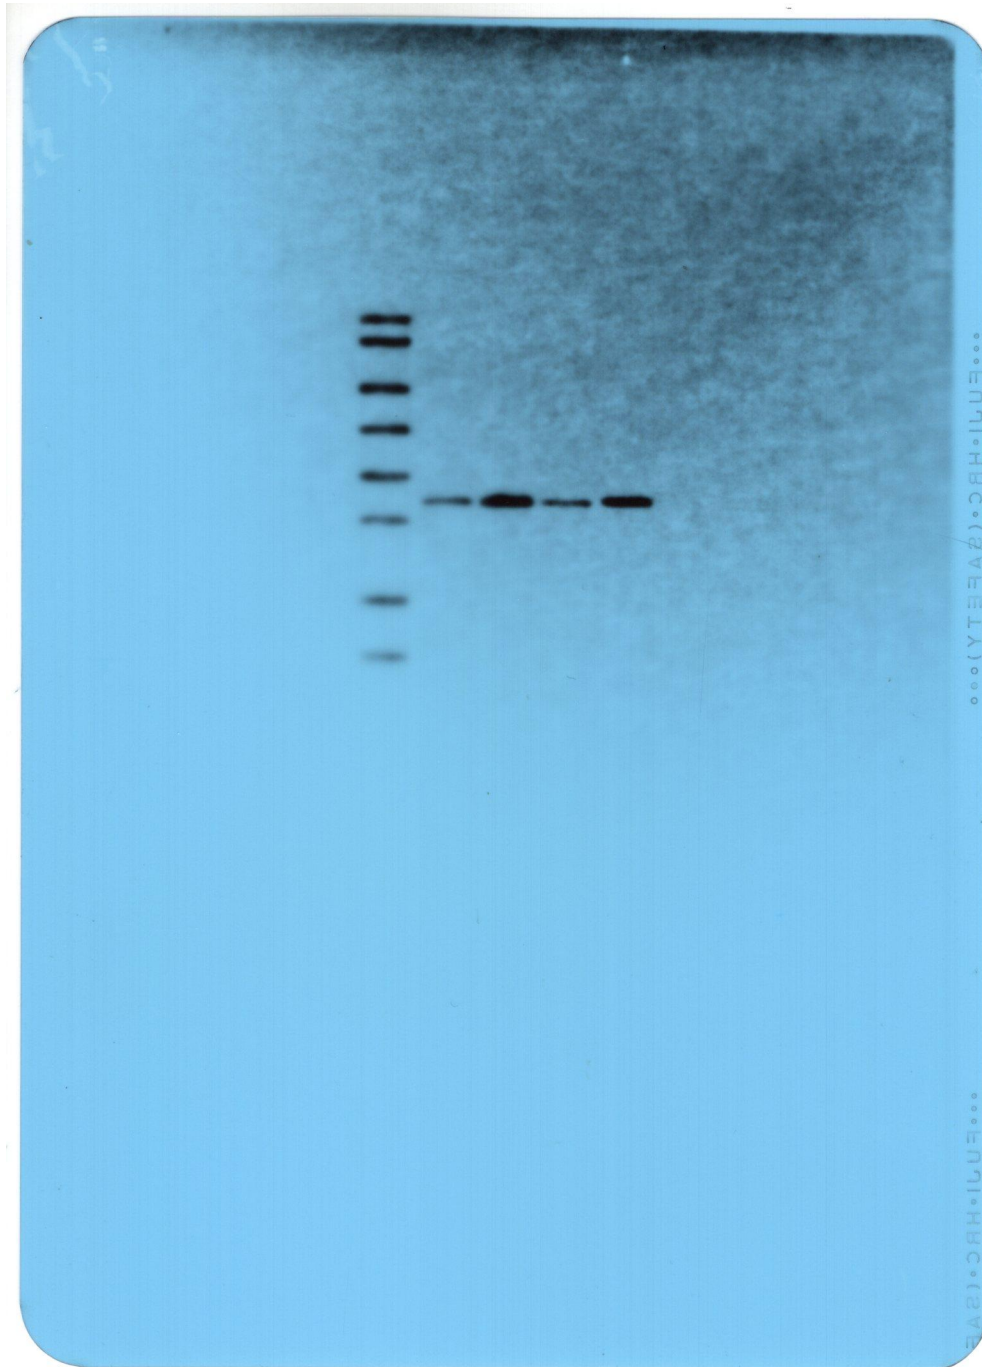

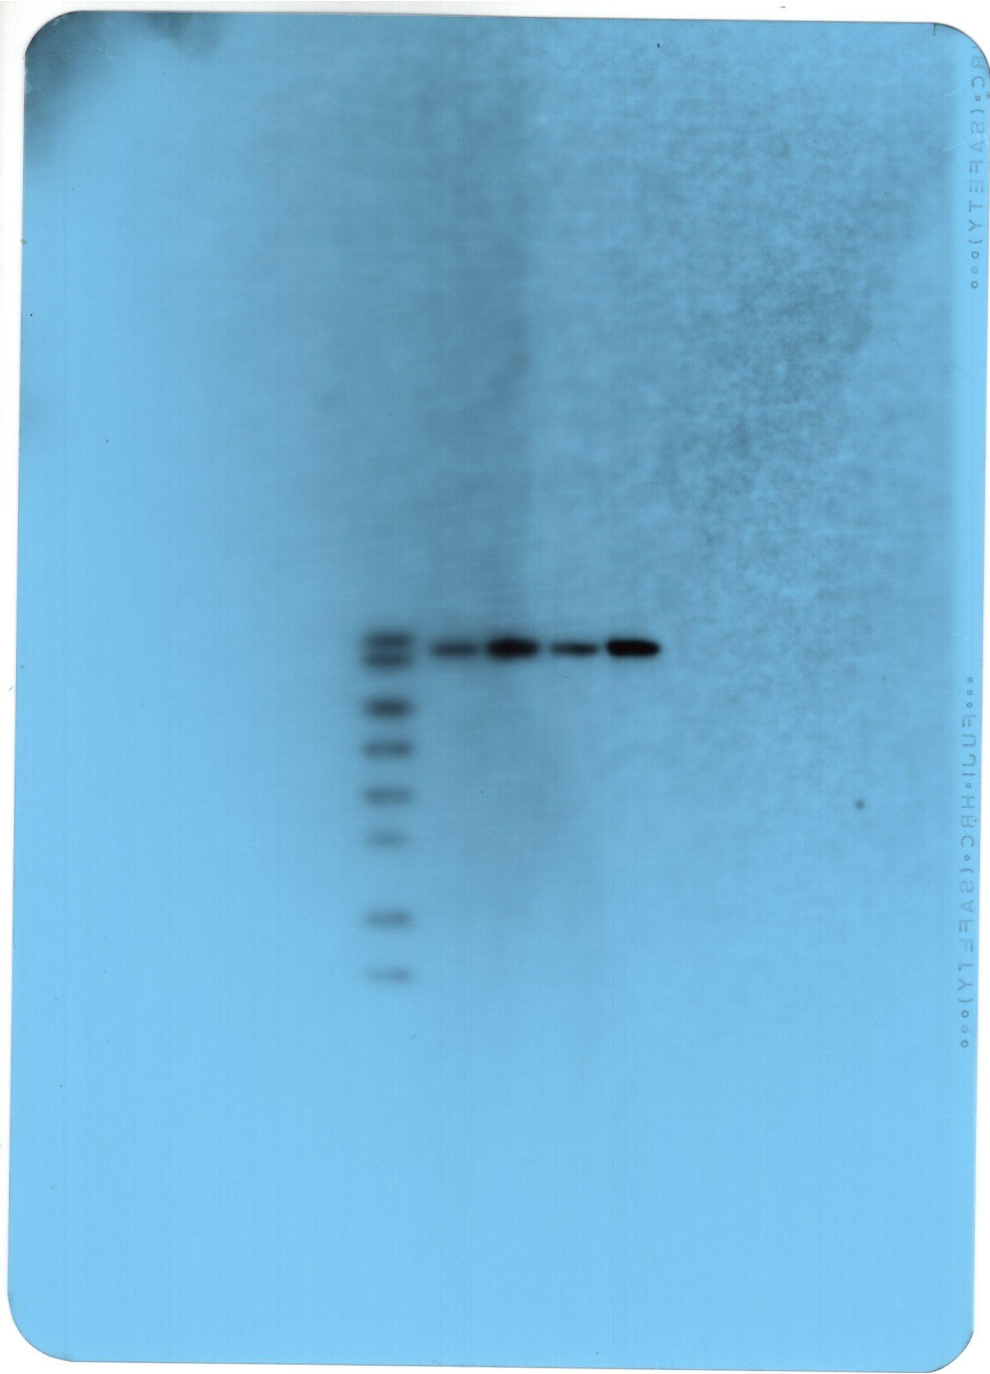

H.C.(SVEFLY)...

...ENJI.H.C.(SVEFLY)...



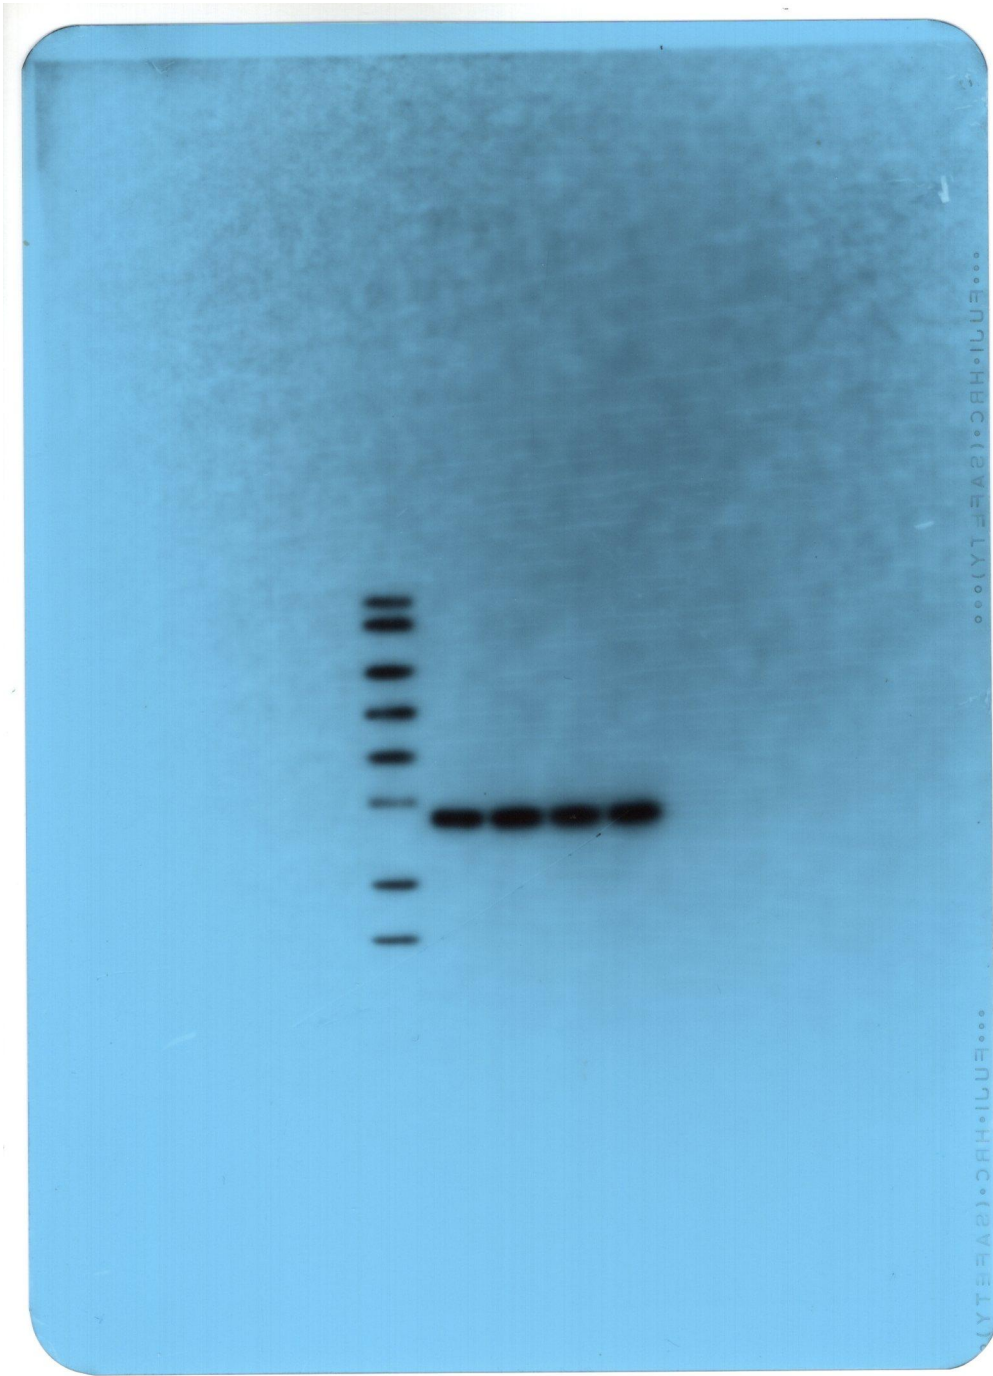

•••EUNJ•HRC•(SVEFLY)•••

•••EUNJ•HRC•(SVEFLY)•••

**Fig 3K: BMI1, ITGB1**

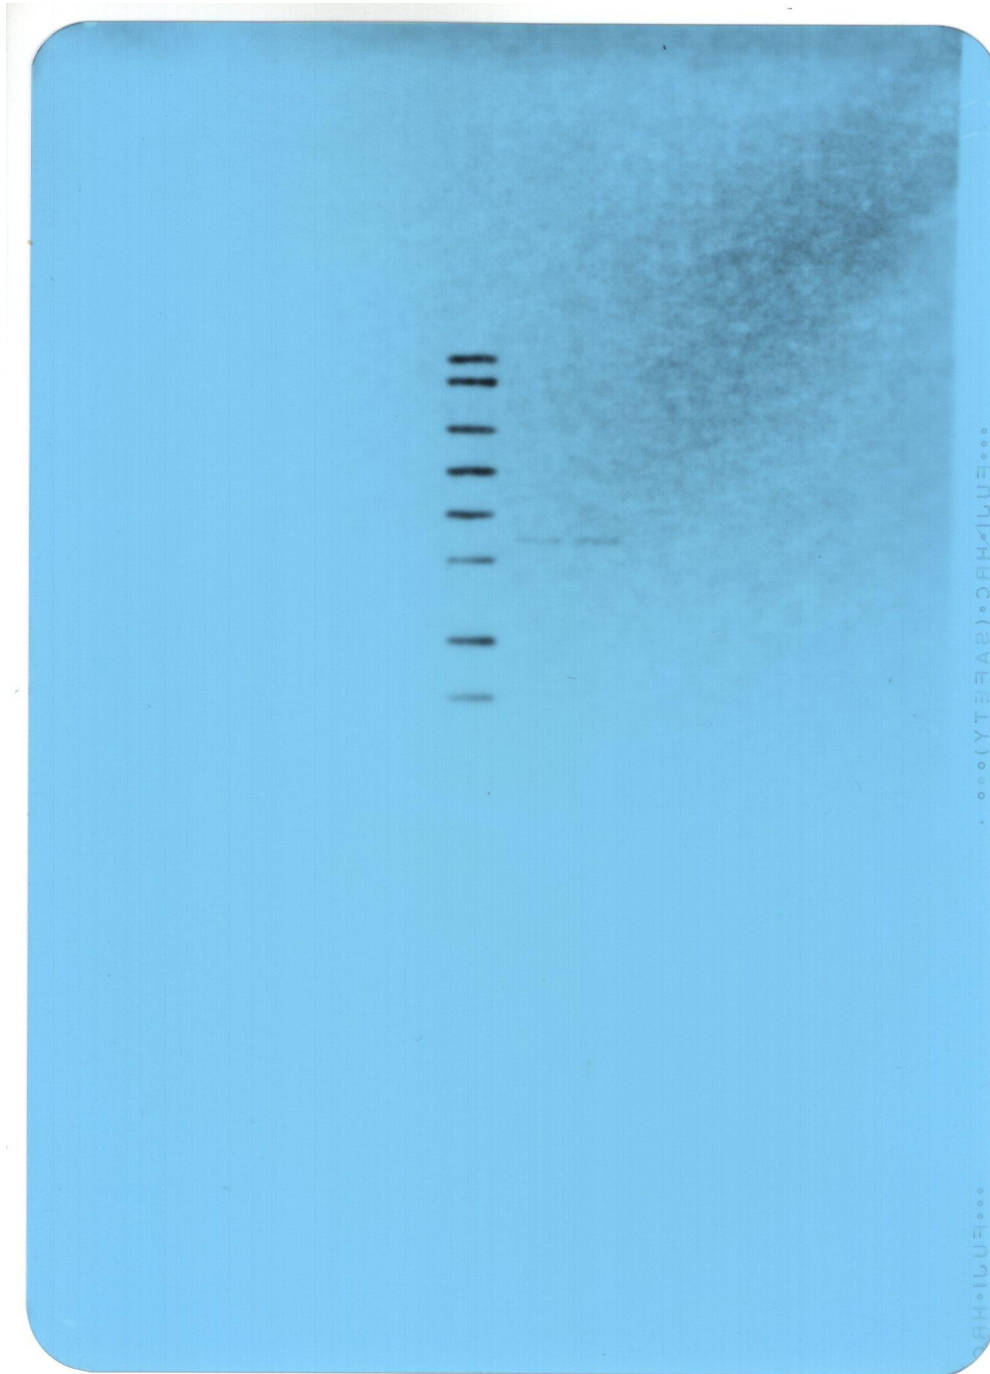

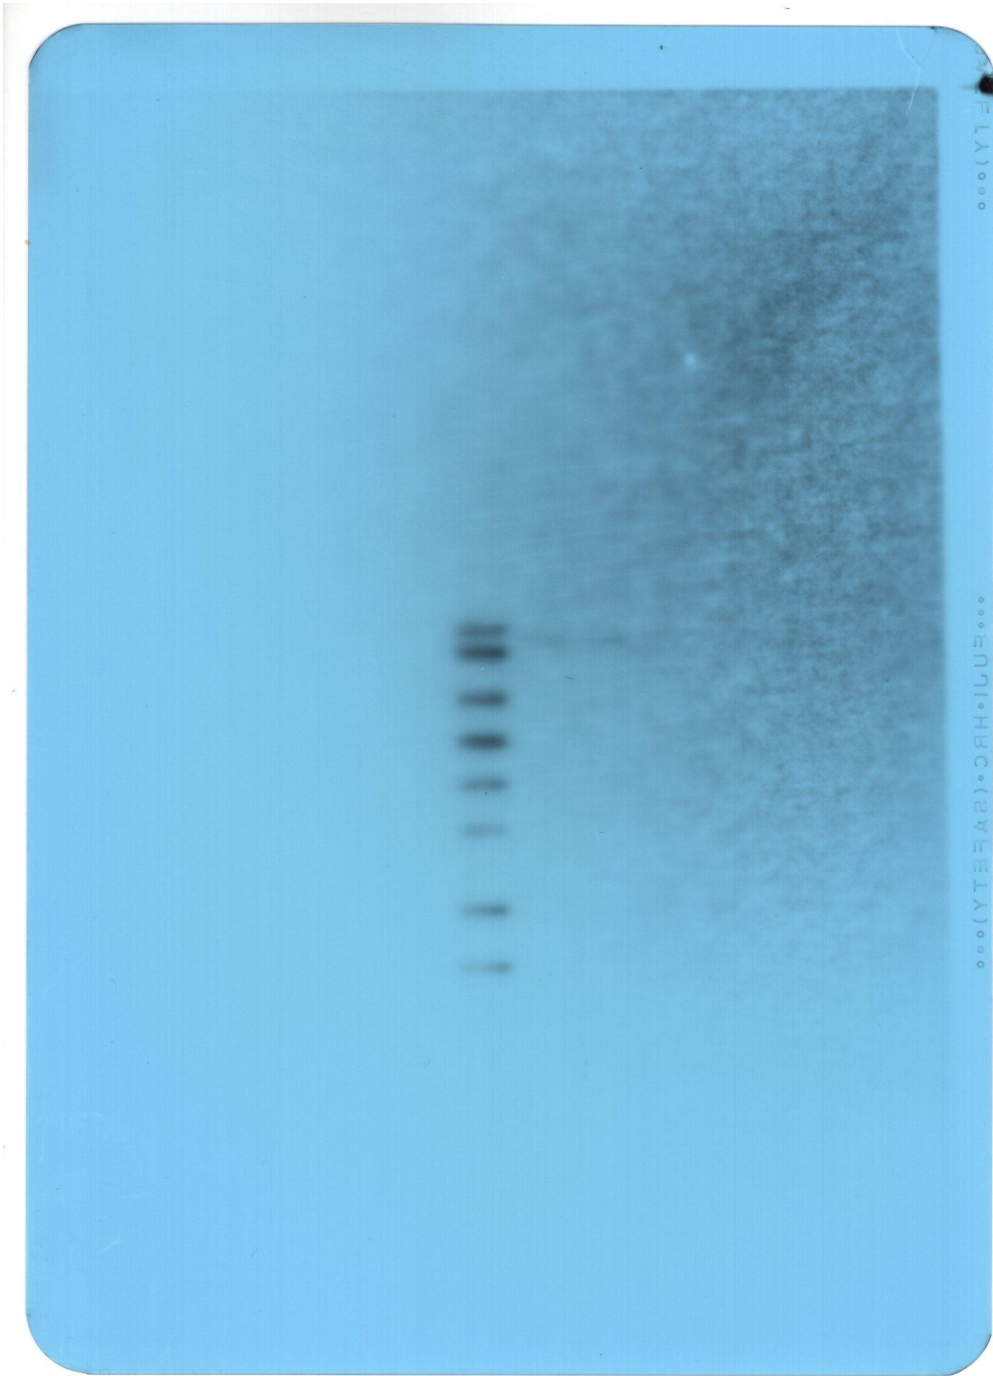

Supplement: MOESM2 [file 26650104]
